# Supplementary material for: Design and usability testing of a home digital management and mobile smart wellness platform for patients with benign prostatic hyperplasia
Source: Research Square preprint supplement (doi:10.21203/rs.3.rs-6387693/v1), 2025-05-19
Supplement: Supplementary file 1 [file b25fff18397263bdab2c28db.docx]

Table1 User satisfaction assessment.

| Entry | strongly agree | agree | general | disagree | Strongly  disagree |
| --- | --- | --- | --- | --- | --- |
| I think that I would like to use this system frequently. |  |  |  |  |  |
| I found the system unnecessarily complex. |  |  |  |  |  |
| I thought the system was easy to use. |  |  |  |  |  |
| I think that I would need the support of a technical person to be able to use this system. |  |  |  |  |  |
| I found the various functions in this system were well integrated |  |  |  |  |  |
| I thought there was too much inconsistency in this system. |  |  |  |  |  |
| I would imagine that most people would learn to use this system very quickly. |  |  |  |  |  |
| I found the system very cumbersome to use. |  |  |  |  |  |
| I felt very confident using the system. |  |  |  |  |  |
| I needed to learn a lot of things before I could get going with this system. |  |  |  |  |  |
| Total score |  |  |  |  |  |

Table2 Score of the usability survey questionnaire for human-machine exchange interface

| Entry | Score |
| --- | --- |
| Functionality |  |
| I think its functions are very comprehensive |  |
| I think its function is not difficult |  |
| It meets my basic usage needs |  |
| It has strong compatibility |  |
| Learnability |  |
| I think I can get started quickly |  |
| I am confident in completing operational tasks |  |
| I have encountered similar situations before |  |
| High efficiency |  |
| I don't think its operation is complicated |  |
| Its information feedback and prompts are very fast |  |
| It makes my operation success rate very high |  |
| 11. Its interactive actions are basically consistent |  |
| Interactive experience |  |
| I think it's easy to use |  |
| All functions can be operated |  |
| It doesn't require too much waiting to use |  |
| It is relatively easy to use |  |
| Satisfaction level |  |
| Its interface design is aesthetically pleasing |  |
| Its color matching is harmonious |  |
| It looks familiar to me |  |
| I want to continue using it |  |
| I am happy to share it with others |  |
| Total score |  |

Notes：strongly agree（5） agree（4） general（3）, disagree（2）Strongly disagree（1）
